# Supplementary material for: Fission yeast condensin contributes to interphase chromatin organization and prevents transcription-coupled DNA damage
Source: PubMed Central journal article supplement (PMC7643427; doi:10.1186/s13059-020-02183-0), 2020-11-05

**Additional File 3: Uncropped immunoblots**

**Figure 1c**

$\alpha$ -AID

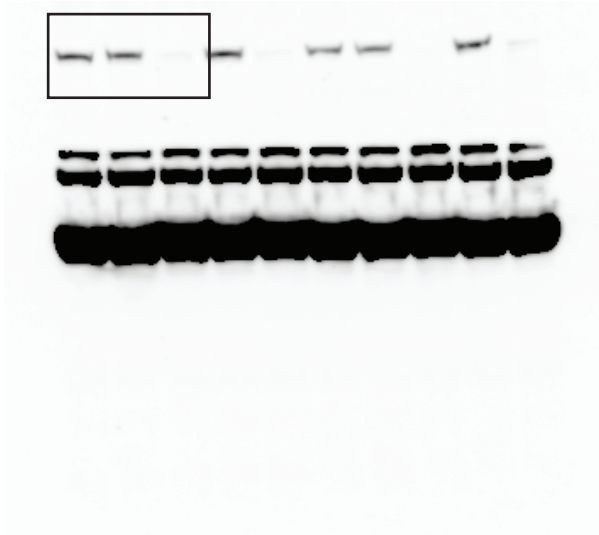

$\alpha$ -TAT1

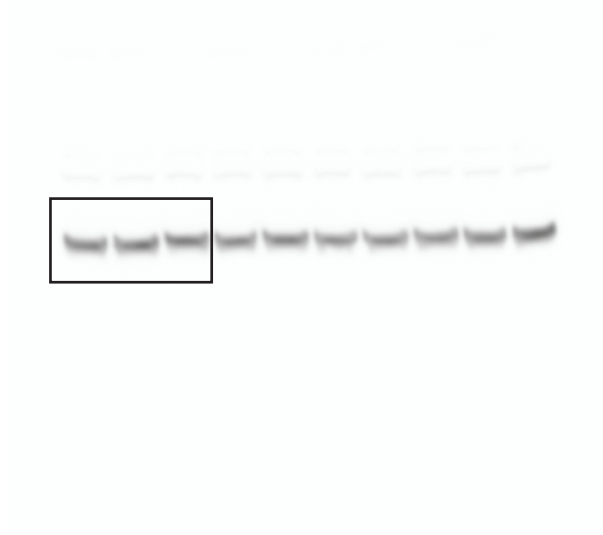

**Figure S1a**

$\alpha$ -AID

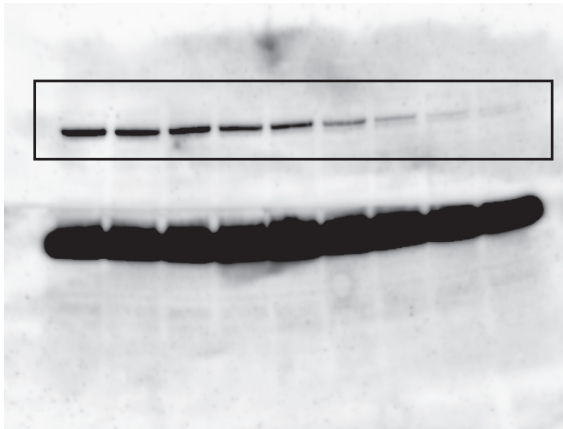

$\alpha$ -TAT1

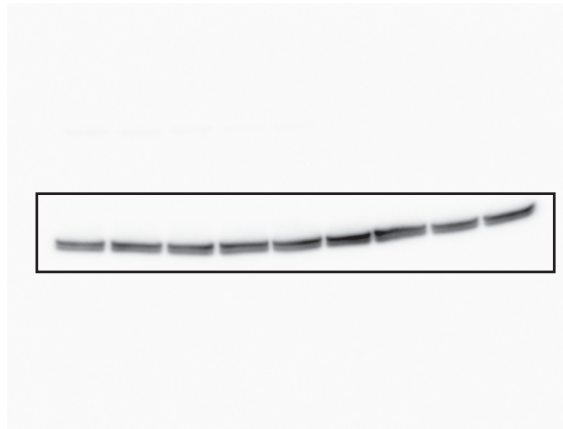

**Figure S3a**

$\alpha$ -AID

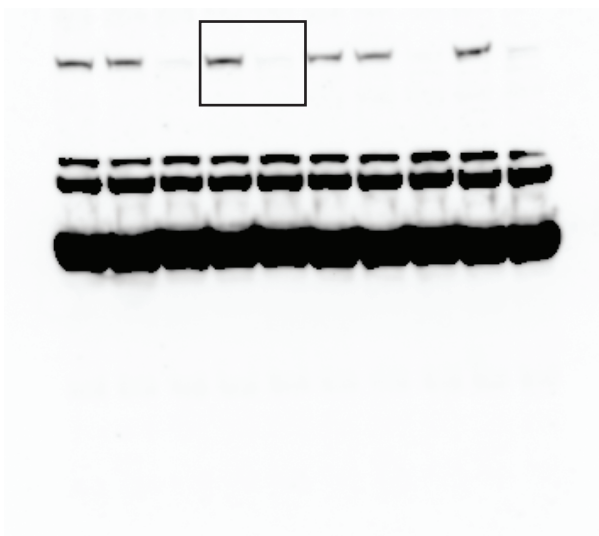

$\alpha$ -TAT1

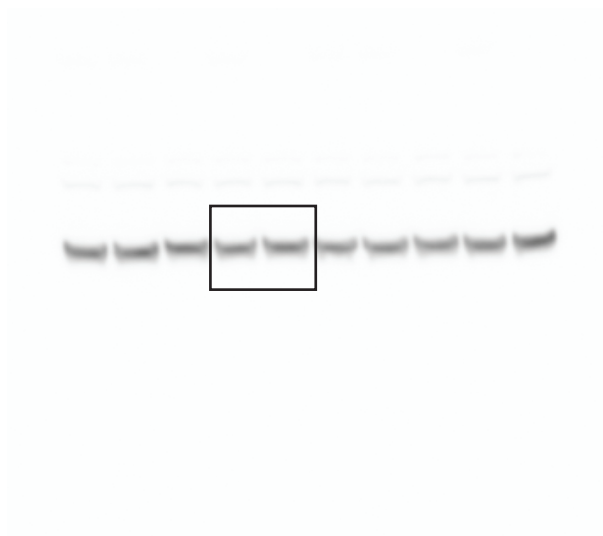

**Figure S8a**

$\alpha$ -AID

$\alpha$ -GFP

$\alpha$ -TAT1

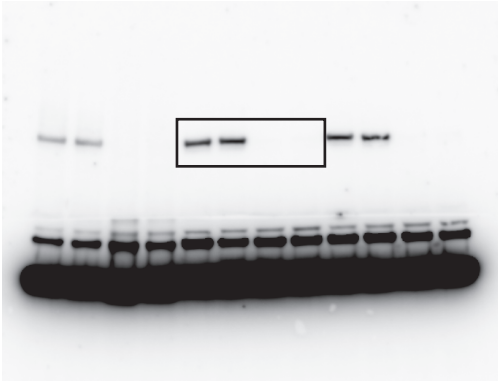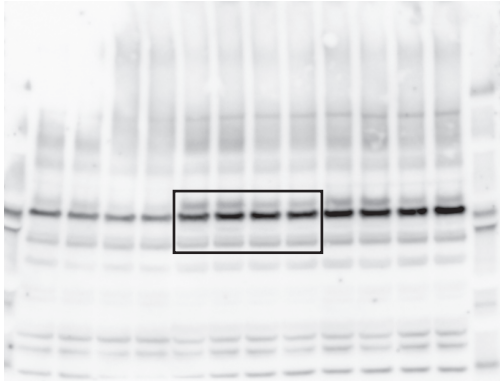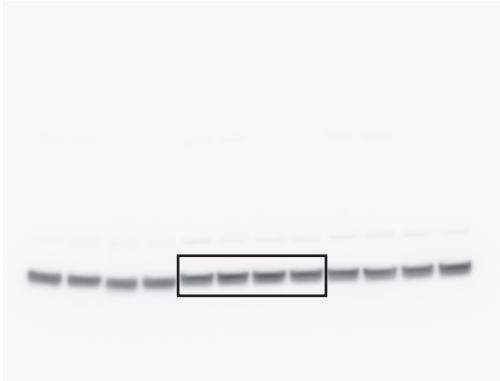

Supplement: 13059_2020_2183_MOESM3_ESM.pdf [file 13059_2020_2183_MOESM3_ESM.pdf]
